# Supplementary material
Source: PubMed Central journal article supplement (PMC2807309)

## Supplemental Data

### SUPPLEMENTAL FIGURE LEGENDS

**FIGURE S1. Alignment of the amino acid sequence of the S Tail.** The predicted S tails from the indicated animal species were aligned with the human S tail using the ClustalW2 program. Amino acids different from those in the human S tail are in red. The length of each S tail is indicated on the right. Note that the predicted rabbit and mouse S tails are 14 and 22 amino acids shorter than the human S tail.

**FIGURE S2. Lack of effect of the S tail on  $\text{Ca}^{2+}$  channel properties.** cRNA of No.8 was co-injected into *Xenopus* oocytes with the channel complex cRNAs, and cell-attached patch clamps (A-E) were performed.  $\beta_3$ \_core, amino acids G16-G366 of full length  $\beta_3$ , is as potent as  $\beta_3$  to regulate channel activation and membrane targeting (5,45). A, current-voltage relationship. B, voltage-dependent activation. C, deactivation constant  $\tau_{\text{deact}}$ . D, voltage-dependent inactivation. E, representative inactivation traces. N=5-6.

**FIGURE S3. Co-localization of overexpressed No.8 and  $\beta_3$  in the nuclei of HEK 293T cells.** A, No.8 (fused with DsRed) and  $\beta_3$  (fused with EGFP) were expressed separately. B, three individual examples, displayed in three rows, showing the co-localization of No.8 and  $\beta_3$  in the nuclei when they were co-expressed. Note that the two proteins aggregate on the nuclear membrane. Bar, 10  $\mu\text{m}$ .

Zhang et al., Figure S1

|                    |                                                           |    |
|--------------------|-----------------------------------------------------------|----|
| Human              | VSAAGGGLHNPGR-EVRSGSGPADLIGCVCTLESFSHYSDWLDQSSRRQSIPSLSD- | 57 |
| Chimpanzee         | VSAAGGGLHNPGR-EVRSGSGPADLIGCVCTLESFSHYSDWLDQSSRRQSIPSLSD- | 57 |
| Sumatran orangutan | VSAAGGGLHNPGR-EVRSGSRPVDLIGCVCTLESFLHYSDWFDQSSRRQSIPSLSD- | 57 |
| Olive baboon       | VSAAGGGLHNPGR-EVRSGSGPADLVGCVCTPGSFSHYSDWFDQSSRRQSIPCLSD- | 57 |
| Rhesus monkey      | VSAAGGGLHNPGR-EVRSGSGPADLVGCVCAHGSFSHYSDWFDQSSRRQSIPSLSD- | 57 |
| Rabbit             | VSEASGLLNGLRGETSNGSG-AAPLG--ASLPTVIG-----LTSQVQDS         | 43 |
| Mouse              | VREDGHLH----R--ARDGFRLADPIHCIYSLG-----PSCDSD-             | 35 |

Zhang et al., Figure S2

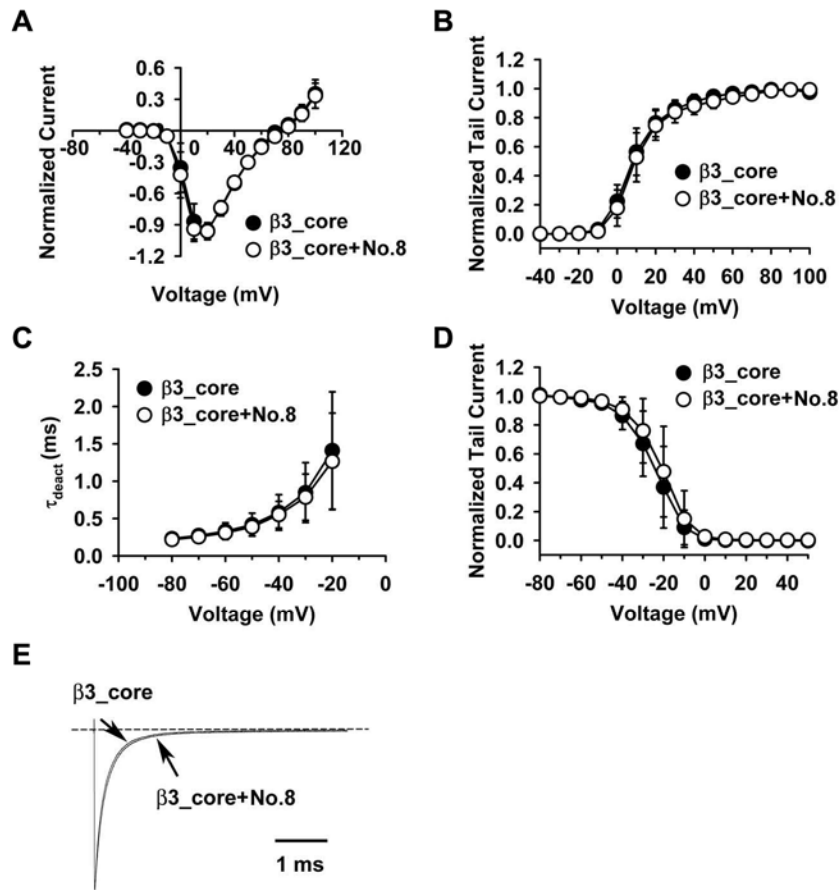

Zhang et al., Figure S3

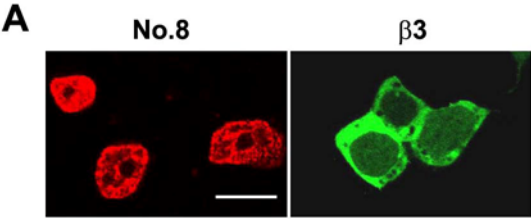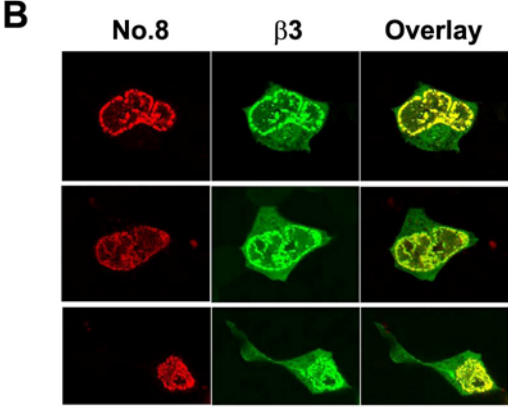

Supplement: supp_M109.022236_jbc.M109.022236-1.pdf [file supp_M109.022236_jbc.M109.022236-1.pdf]
